# Supplementary material for: Au nanoparticles supported on magnetically separable Fe2O3–graphene oxide hybrid nanosheets for the catalytic reduction of 4-nitrophenol
Source: Royal Society of Chemistry journal article supplement (doi:10.1039/c4ra13989e), 2014-12-22
Supplement: c4ra13989e1.pdf [file c4ra13989e1.pdf]

## Supporting Information

### **Au nanoparticles supported on magnetically separable Fe<sub>2</sub>O<sub>3</sub>- graphene oxide hybrid nanosheets for the catalytic reduction of 4-nitrophenol**

Hyunje Woo,<sup>a</sup> Ji Woong Kim,<sup>b</sup> Miran Kim,<sup>a</sup> Sungkyun Park<sup>b</sup> and Kang Hyun Park<sup>\*a</sup>

<sup>a</sup> Department of Chemistry and Chemistry Institute for Functional Materials, Pusan National University, Busan 609-735, Korea. E-mail: chemistry@pusan.ac.kr; Tel.: +82-51-510-2238; Fax: +82-51-980-5200.

<sup>b</sup> Department of Physics, Pusan National University, Busan 609-735, Korea.

## Experimental Section

**Instrumentation.** The morphology of each sample was characterized by transmission electron microscopy (TEM) (FEI, Tecnai F30 Super-Twin, National Nanofab Center, South Korea) by placing a few drops of the corresponding colloidal solution on carbon-coated copper grids (200 mesh, F/C coated, Ted Pella Inc., Redding, CA, USA). Magnetization data were taken using a superconducting quantum interference device (SQUID) (MPMS-7, Quantum design). Dynamic force microscope (DFM) images were taken using a SPA 400 (Seiko). The elemental compositions of the hybrid catalysts were obtained using energy-dispersive x-ray spectroscopy (EDS) (550i, IXRF Systems, Inc.), while the x-ray diffractometer (XRD) patterns were recorded by a Rigaku GDX-11P3A diffractometer (Pusan National University). X-ray photoelectron spectroscopy (XPS) (Theta Probe, Thermo) were employed to measure the structural and chemical properties of the nanocomposites. The porous structure of the  $\text{FeSO}_4 \cdot (\text{H}_2\text{O})$ ,  $\text{Fe}_2\text{O}_3$ -GO and  $\text{Au/Fe}_2\text{O}_3$ -GO nanocomposites was analyzed by acquiring nitrogen-adsorption isotherms (ASAP 2020, Micromeritics). Prior to the  $\text{N}_2$ -adsorption measurements, the samples were degassed under a vacuum at 100 °C for 12 h. The surface area and pore-size distribution of the samples were calculated by using the Brunauer-Emmett-Teller (BET) equation and the BJH method, respectively. Thermal gravity analyzer (TGA) was carried out using an ASAP 2020 (Micromeritics) instrument. The concentration of 4-nitrophenol was determined using a spectrophotometer at a wavelength of 400 nm using a SINCO S-3150 spectrophotometer.

**Synthesis of  $\text{Fe}_3\text{O}_4$  microspheres.** Magnetite particles were synthesized using a solvothermal method.<sup>1</sup> The details were as follows:  $\text{FeCl}_3 \cdot 6\text{H}_2\text{O}$  (1.4 g, 5.2 mmol) and trisodium citrate (0.29 g, 0.96 mmol) were dissolved in ethylene glycol/ethanol (36 mL/4 mL) solution; then, sodium acetate (1.9 g, 23 mmol) was added under vigorous stirring for 5 min. The resulting mixture was then transferred to a Teflon-lined stainless-steel autoclave (with a capacity of 50 mL) for heating at 200 °C for 10 h. Then, the autoclave was carefully taken out and allowed to cool to room temperature. The as-made black products were thoroughly washed with ethanol three times, and they were then vacuum-dried.

**Synthesis of  $\text{Au/Fe}_3\text{O}_4$  microspheres.** Au nanoparticles were immobilized onto  $\text{Fe}_3\text{O}_4$  microspheres according to modified procedure of Yang et al. literature.<sup>1</sup> Each  $\text{Fe}_3\text{O}_4$  microspheres (100 mg) were incubated in 0.2 M NaOH aqueous solution to ionize the

carboxyl groups. The residual NaOH was removed by washing with deionized water through centrifugation. Then, the ionized Fe<sub>3</sub>O<sub>4</sub> microspheres were dispersed in the solution (30 mL, 0.1 M) of HAuCl<sub>4</sub>·3H<sub>2</sub>O during 1 h under sonication. After this, the microspheres were harvested with the aid of the magnet and washed with deionized water three times. Then, the microspheres were redispersed in 20 mL of deionized water, and 1 mL of 50 mM NaBH<sub>4</sub> aqueous solution was added dropwise under the ice water bath during 5 minutes with vigorous stirring. The final product was purified through washing with ethanol three times and dried under vacuum.

**Synthesis of GO nanosheets.** GO was synthesized from graphite powder according to the modified Hummer's method.<sup>2</sup> The graphite powder (1 g) was added to 46 mL of cold H<sub>2</sub>SO<sub>4</sub> (0 °C), then KMnO<sub>4</sub> (6 g) was gradually added under continuous stirring in ice-bath. After 15 min, NaNO<sub>3</sub> (1 g) was introduced into the mixture. The solution was further stirred at 35 °C for 1 h and DI-H<sub>2</sub>O (80 mL) was added. After being stirred for 15 min, the reaction was terminated by addition of DI-H<sub>2</sub>O (200 mL) and 10 mL of 30% H<sub>2</sub>O<sub>2</sub>. The product was washed with HCl (1:10) and then with water, and then suspended in distilled water. The brown dispersion was extensively dialyzed to remove residual metal ions and acids. After the unexploited graphite in the resulting mixture was removed by centrifugation, as-synthesized GO was dispersed into individual sheets in distilled water at a concentration of 0.47 mg/mL with the help of sonication.

**Synthesis of FeSO<sub>4</sub>(H<sub>2</sub>O)-GO nanosheets.**<sup>3</sup> In a typical process, 2 mmol FeCl<sub>3</sub>·6H<sub>2</sub>O were dissolved in 20 mL distilled water. Then 0.315 g polyvinyl pyrrolidone as surfactant was added. After stirring for at least 20 mins, 0.4 ml 37.5% H<sub>2</sub>SO<sub>4</sub> was added. After stirring for another several minutes, the precursor solution was separated by two parts (10 ml each). One part was added with 10ml GO ethylene glycol solution (20g L<sup>-1</sup>) and was treated by ultrasonic for 30 mins. Then both two mixtures were heated up to 200 °C in the Teflon-lined autoclave (50 mL in capacity) and maintained at that temperature for 12 h. The precipitates were cooled down to room temperature naturally, collected and washed with distilled water and ethanol several times. After drying at vacuum overnight, the final products were obtained.

**Synthesis of Au/Fe<sub>2</sub>O<sub>3</sub>-GO nanosheets.** Au NPs were immobilized onto Fe<sub>2</sub>O<sub>3</sub>-GO according to modified procedure of Yang et al. literature.<sup>1</sup> Each FeSO<sub>4</sub>(H<sub>2</sub>O)-GO (100 mg) were incubated in 0.2 M NaOH aqueous solution to ionize the hydroxyl groups. The residual NaOH was removed by washing with deionized water through

centrifugation. Then, the  $\text{HAuCl}_4 \cdot 3\text{H}_2\text{O}$  in the solution (30 mL, 0.1 M) were dispersed above mixture during 1 h under sonication. After this, the nanosheets were washed with deionized water three times. Then, the nanosheets were redispersed in 20 mL of deionized water, and 1 mL of 50 mM  $\text{NaBH}_4$  aqueous solution was added dropwise under the ice water bath during 2 minutes with vigorous stirring. The final product was purified through washing with ethanol three times and dried under vacuum.

## References

1. B. Liu, W. Zhang, F. Yang, H. Feng and X. Yang, *J. Phys. Chem. C*, 2011, **115**, 15875.
2. H. Xu, Q. Yang, F. Li, L. Tang, S. Gao, B. Jiang, X. Zhao, L. Wang and C. Fan, *Analyst*, 2013, **138**, 2678.
3. D. Su, H.-J. Ahn and G. Wang, *Chem. Commun.*, 2013, **49**, 3131.

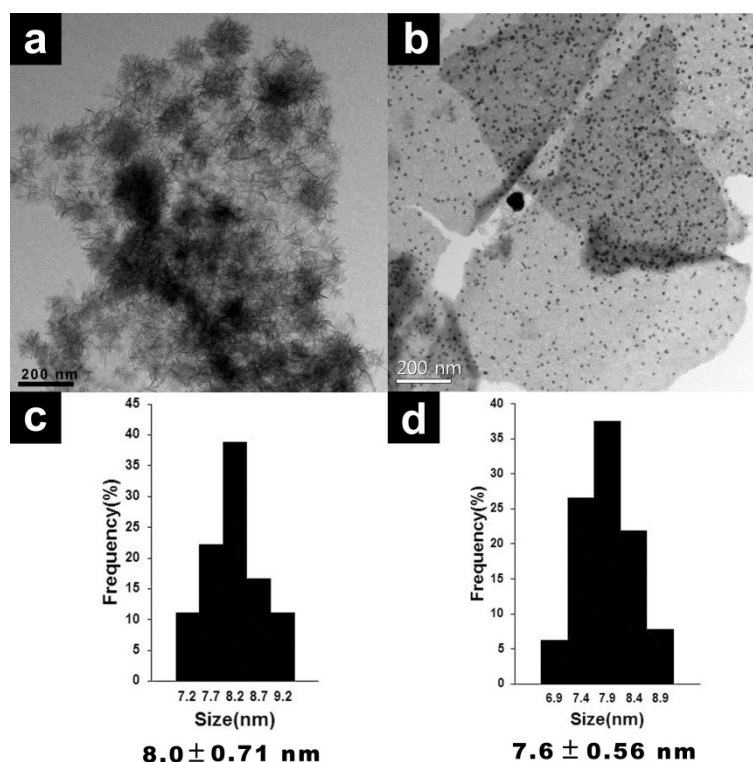

**Fig. S1.** Low resolution TEM images of FeSO<sub>4</sub>(H<sub>2</sub>O)-GO and Au/Fe<sub>2</sub>O<sub>3</sub>-GO (a,b). Size distributions of Au NPs of Au/Fe<sub>3</sub>O<sub>4</sub> and Au/Fe<sub>2</sub>O<sub>3</sub>-GO (c,d).

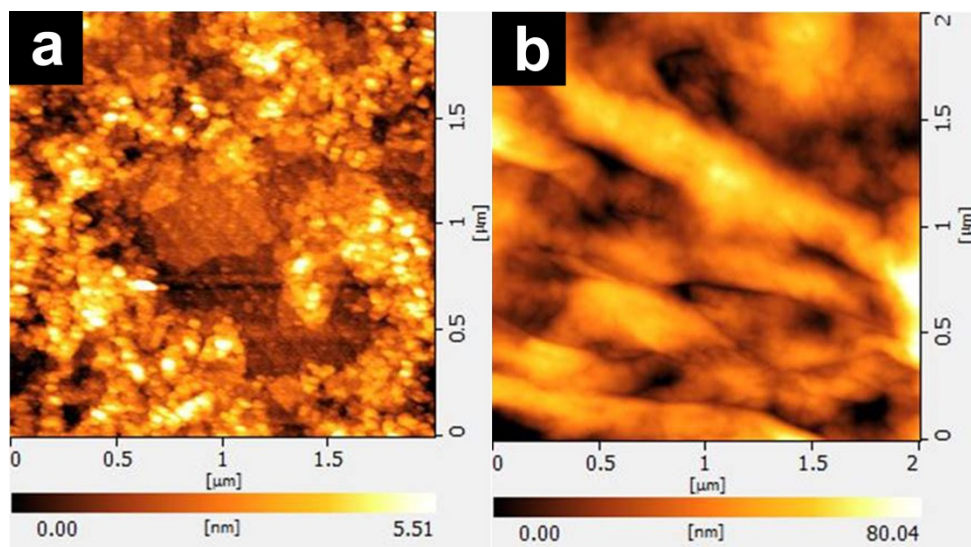

**Fig. S2.** DFM topology images of GO (a) and FeSO<sub>4</sub>(H<sub>2</sub>O)-GO (b) nanocomposites.

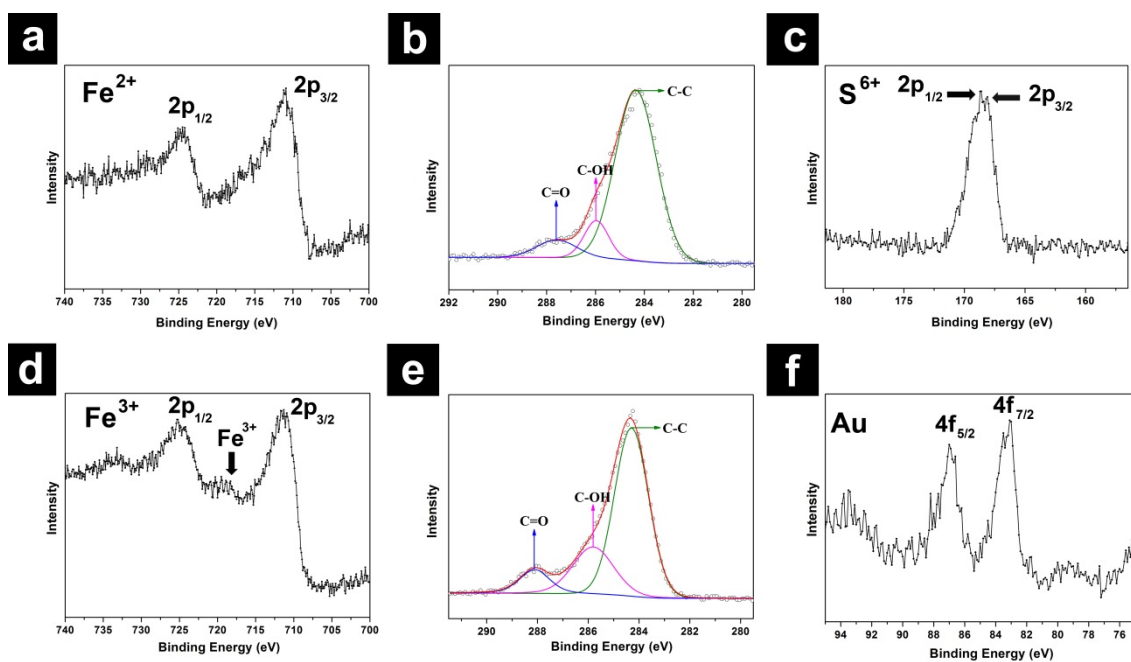

**Fig. S3.** The XPS spectra of Fe<sup>2+</sup>, C and S<sup>6+</sup> of FeSO<sub>4</sub>(H<sub>2</sub>O)-GO (a-c) and Fe<sup>3+</sup>, C and Au of Au/Fe<sub>2</sub>O<sub>3</sub>-GO (d-f).

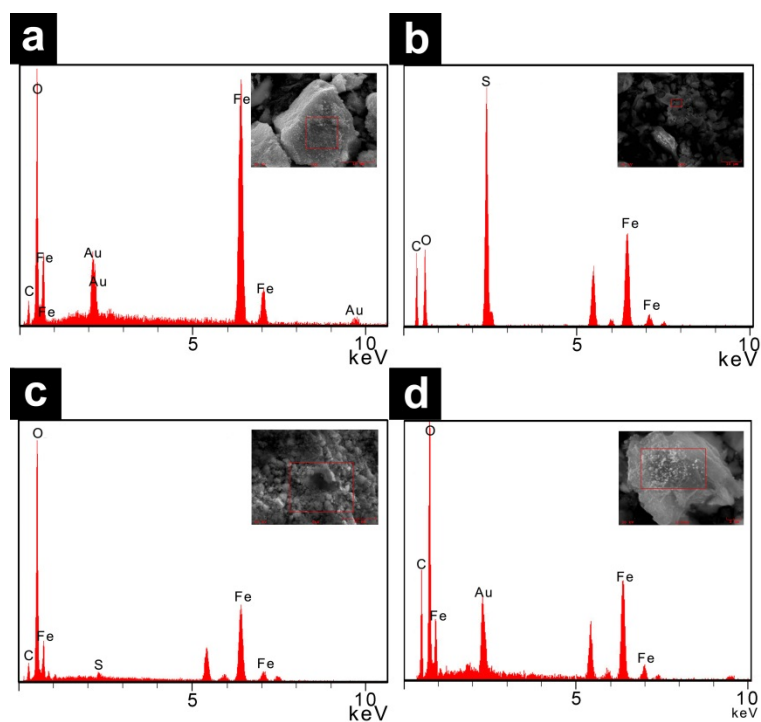

**Fig. S4.** EDS spectrum of (a) Au/Fe<sub>3</sub>O<sub>4</sub>, (b) FeSO<sub>4</sub>(H<sub>2</sub>O)-GO, (c) Fe<sub>2</sub>O<sub>3</sub>-GO and (d) Au/Fe<sub>2</sub>O<sub>3</sub>-GO nanocomposites.

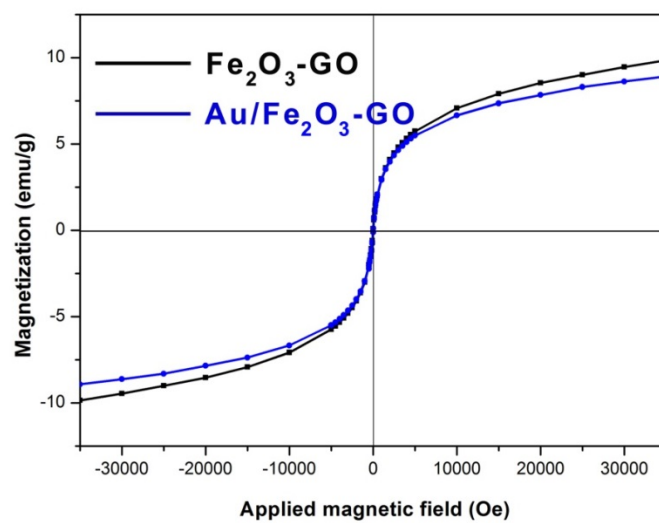

**Fig. S5.** SQUID data of  $\text{Fe}_2\text{O}_3\text{-GO}$  and  $\text{Au/Fe}_2\text{O}_3\text{-GO}$  nanocomposites.

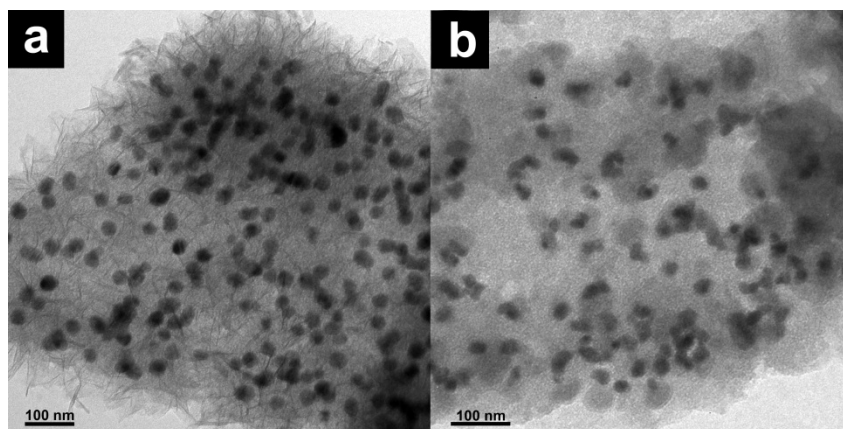

**Fig. S6.** TEM images of  $\text{Au/Fe}_2\text{O}_3\text{-GO}$  catalyst before reaction (a) and after reuse 7 times (b).

**Table S1.** Surface areas, pore volumes and pore diameters of FeSO<sub>4</sub>(H<sub>2</sub>O)-GO, Fe<sub>2</sub>O<sub>3</sub>-GO and Au/Fe<sub>2</sub>O<sub>3</sub>-GO.

| Sample                                  | BET surface<br>area (m <sup>2</sup> g <sup>-1</sup> ) | Langmuir surface<br>area (m <sup>2</sup> g <sup>-1</sup> ) | Pore volume<br>(cm <sup>3</sup> g <sup>-1</sup> ) | Pore diameter<br>(nm) |
|-----------------------------------------|-------------------------------------------------------|------------------------------------------------------------|---------------------------------------------------|-----------------------|
| FeSO <sub>4</sub> (H <sub>2</sub> O)-GO | 18.62                                                 | 25.75                                                      | 0.0342                                            | 11.5                  |
| Fe <sub>2</sub> O <sub>3</sub> -GO      | 213.0                                                 | 291.8                                                      | 0.233                                             | 4.48                  |
| Au/Fe <sub>2</sub> O <sub>3</sub> -GO   | 212.4                                                 | 292.3                                                      | 0.231                                             | 4.43                  |
